# Supplementary material
Source: PubMed Central journal article supplement (PMC4296906)

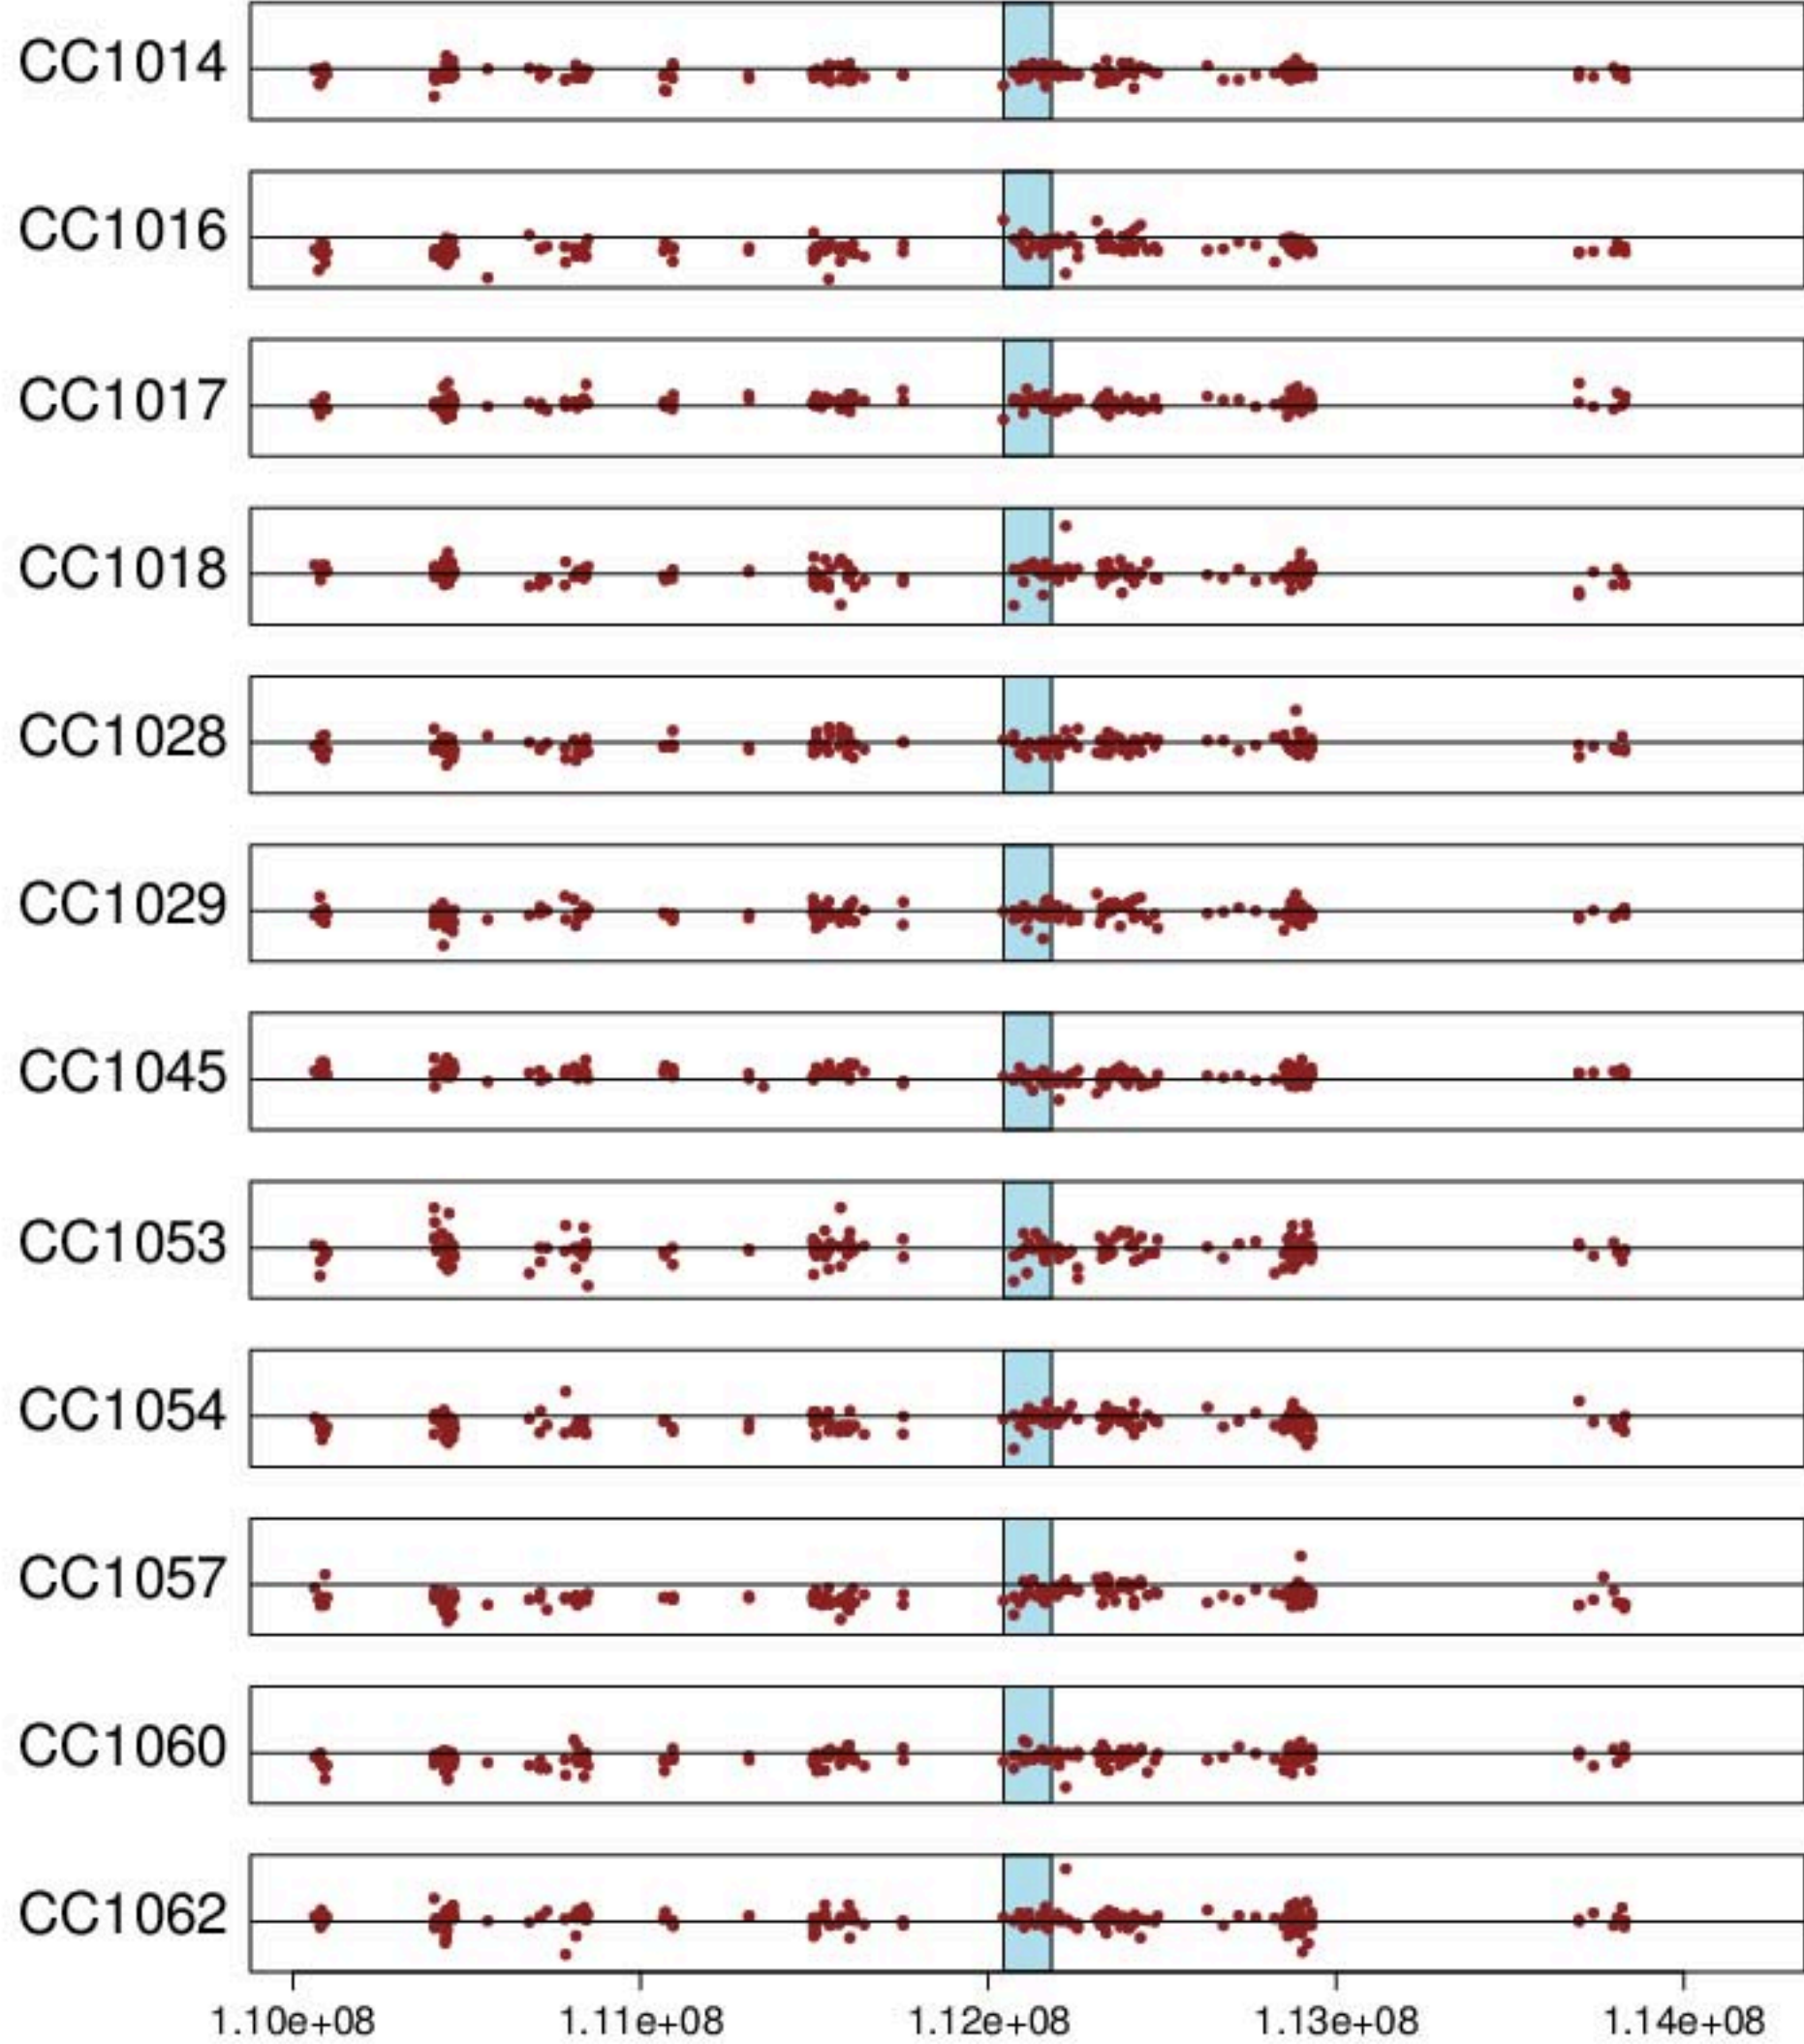

# Fraction of variants present in 1000 genomes

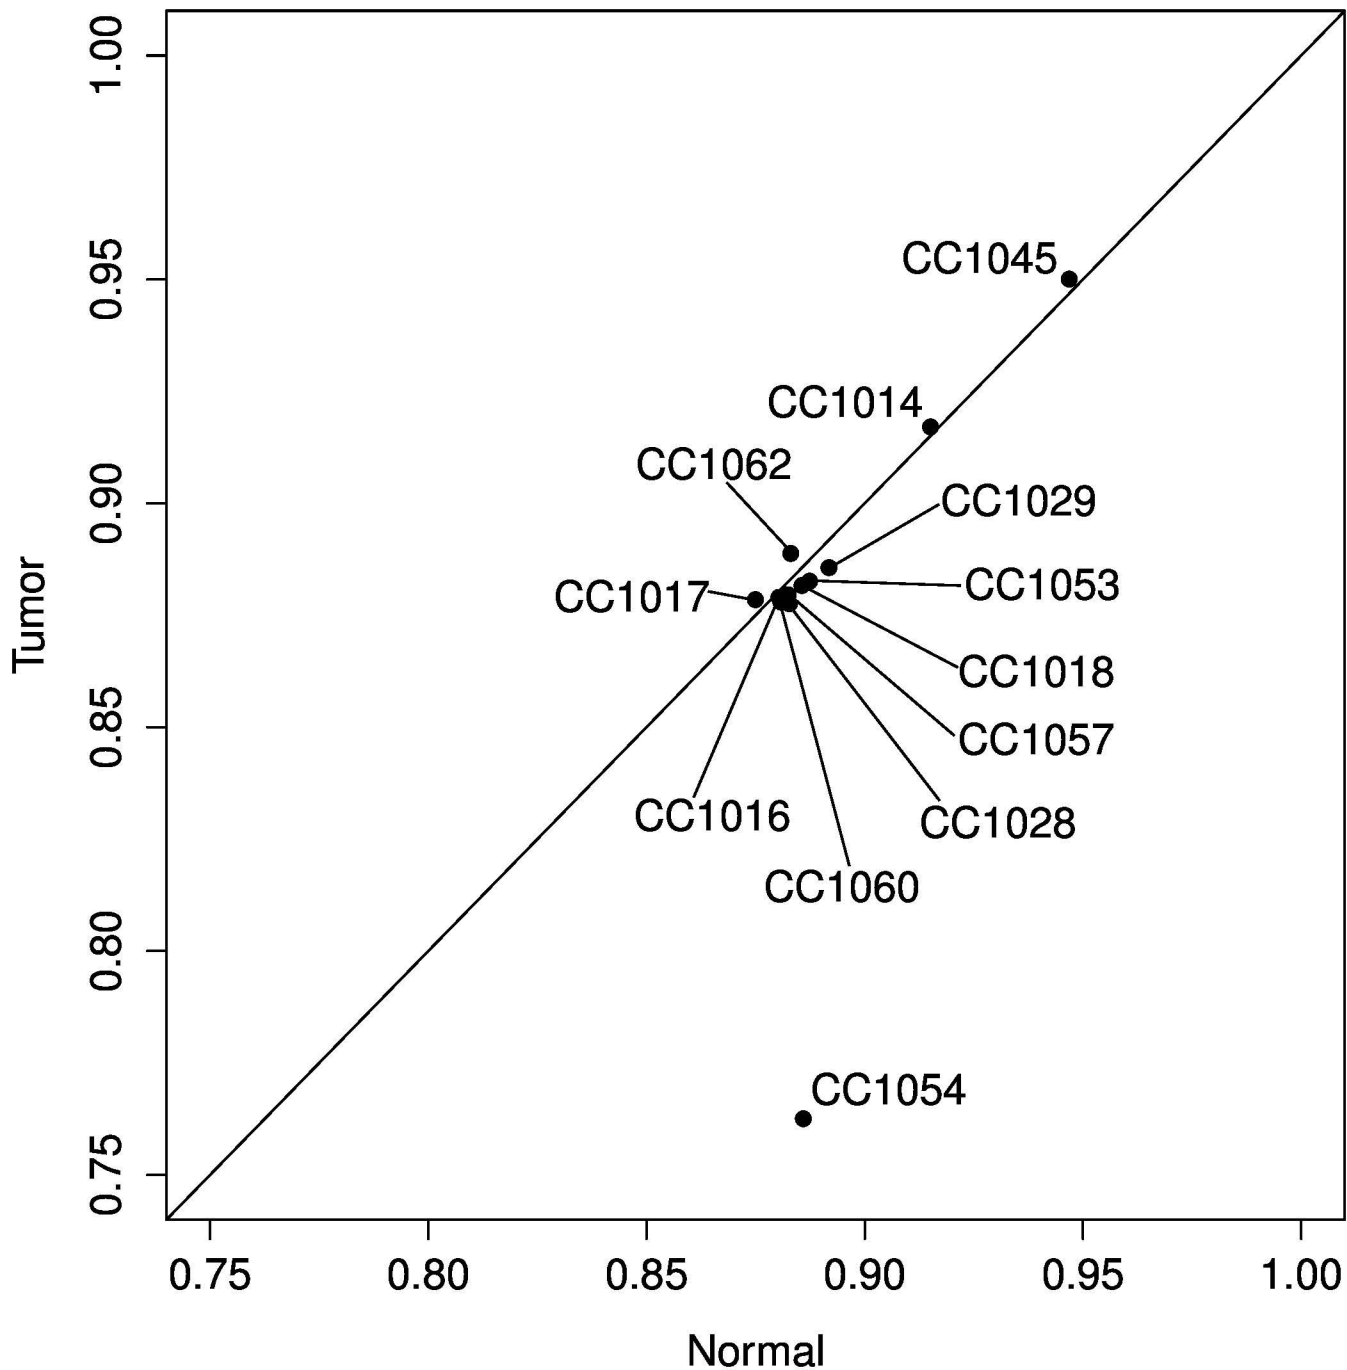

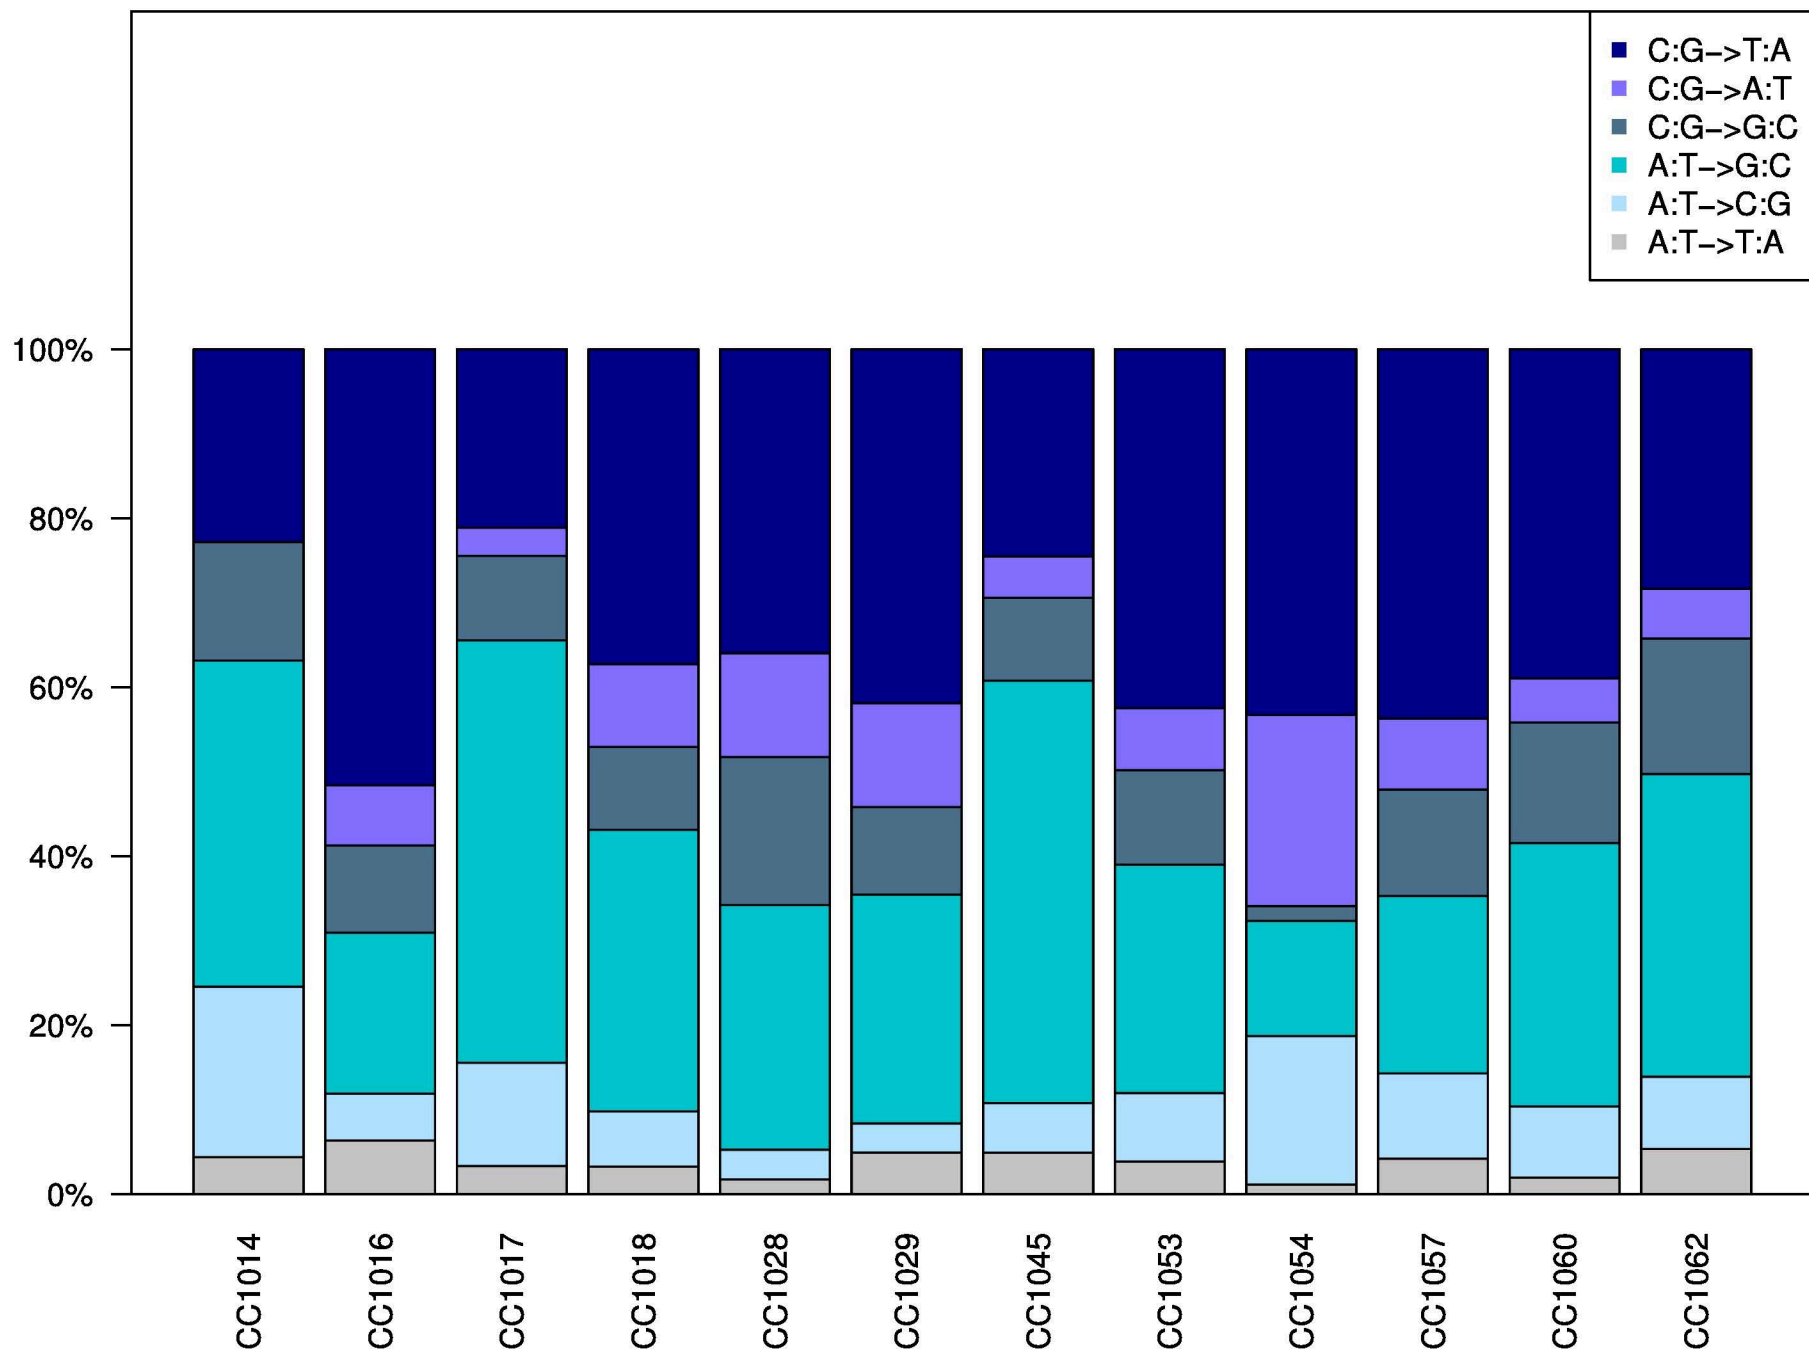

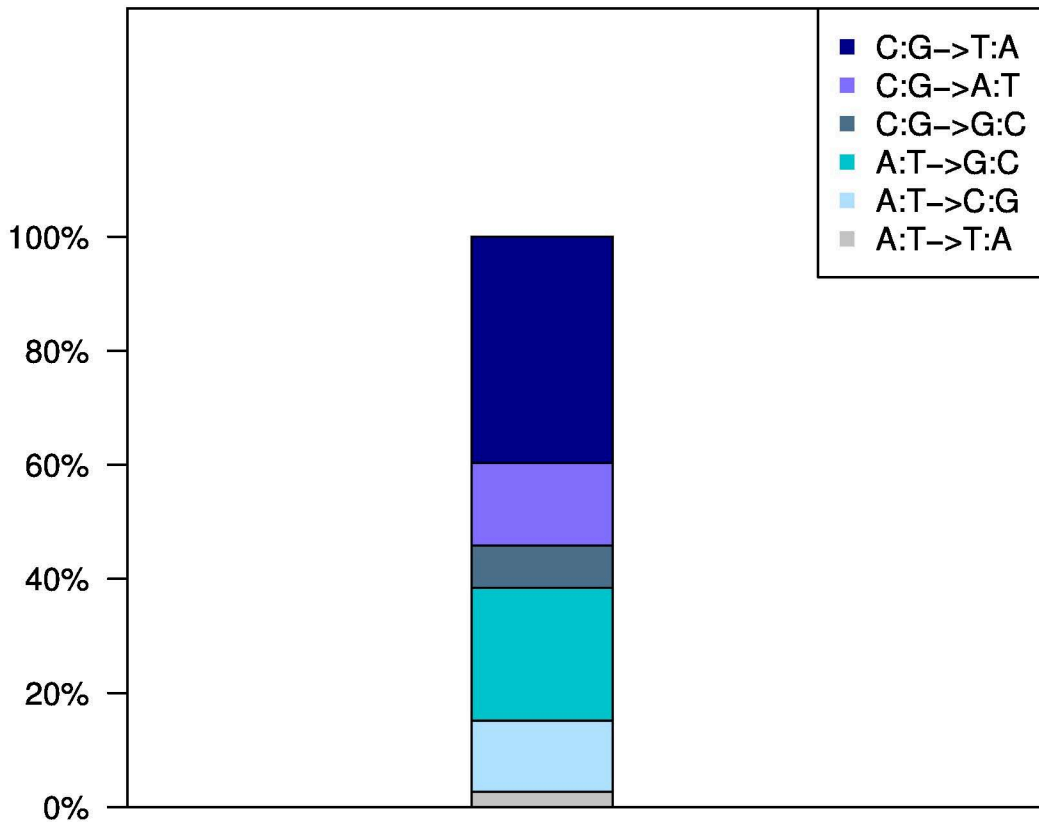

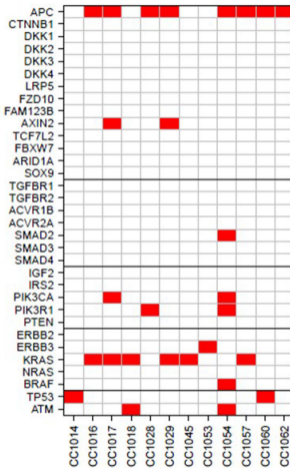

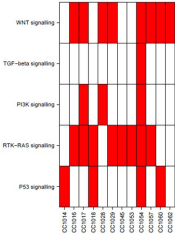

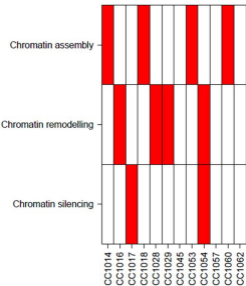



CC1014  
CC1016  
CC1017  
CC1018  
CC1028  
CC1029  
CC1045  
CC1053  
CC1054  
CC1057  
CC1060  
CC1062

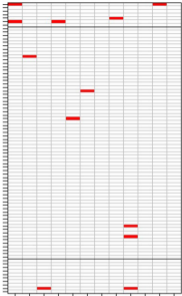

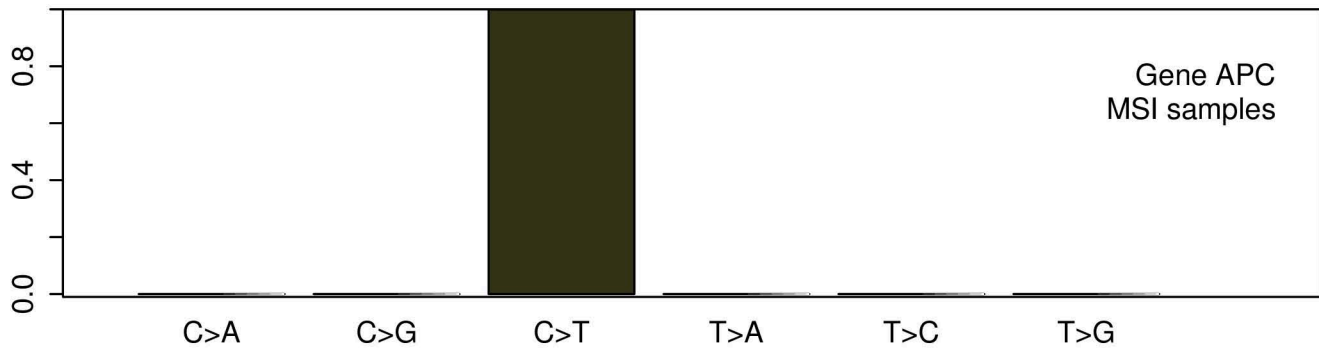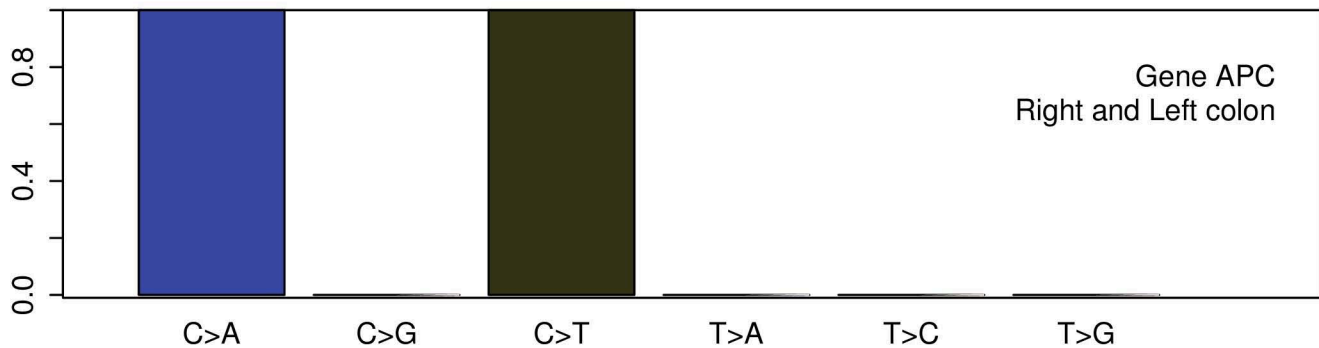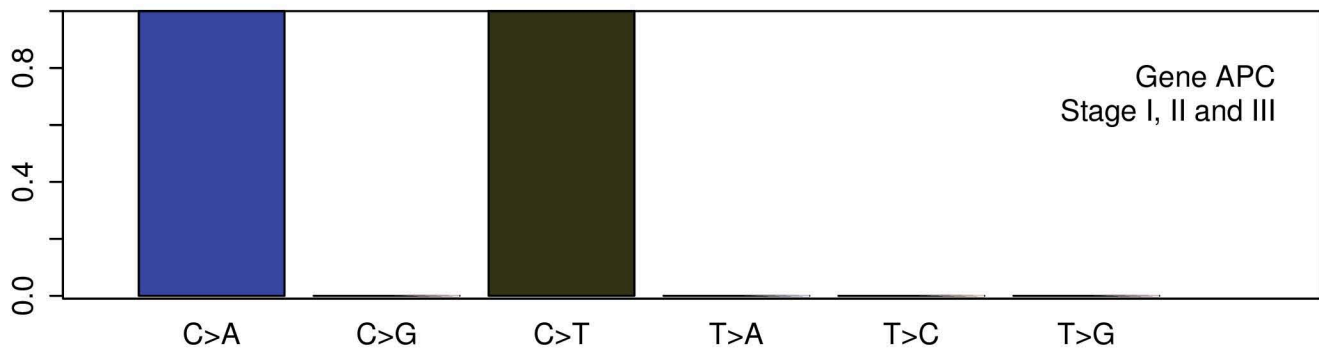

Supplement: NIHMS613715-supplement-Supp_FigureS1-S7.pdf [file NIHMS613715-supplement-Supp_FigureS1-S7.pdf]
